# Supplementary material
Source: PubMed Central journal article supplement (PMC5800402)
Supplement: NIHMS936653-supplement-Supplemental.pdf [file NIHMS936653-supplement-Supplemental.pdf]

**Supporting Information for:**

**Ergot Alkaloid Biosynthesis in the Maize (*Zea mays*) Ergot Fungus *Claviceps gigantea***

Paige E. Bragg,<sup>†</sup> Matthew D. Maust,<sup>†,§</sup> and Daniel G. Panaccione<sup>\*,†</sup>

<sup>†</sup>West Virginia University, Division of Plant and Soil Sciences, Genetics and Developmental Biology Program, 333 Evansdale Drive, Morgantown, WV 26506

<sup>§</sup>Protea Biosciences, 1311 Pineview Drive, Morgantown, WV 26505

\*Corresponding author: (Tel: 1-304-293-8819; E-mail: danpan@wvu.edu)

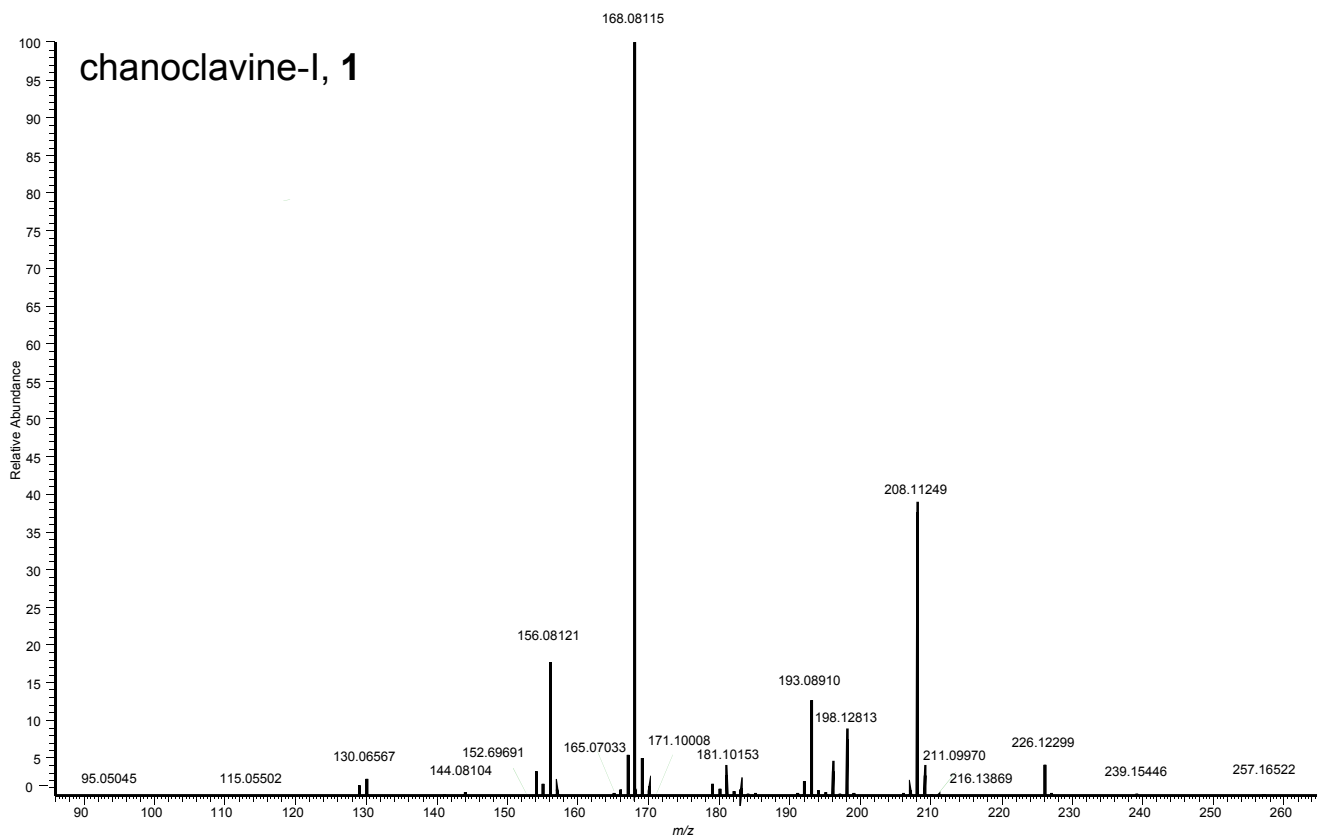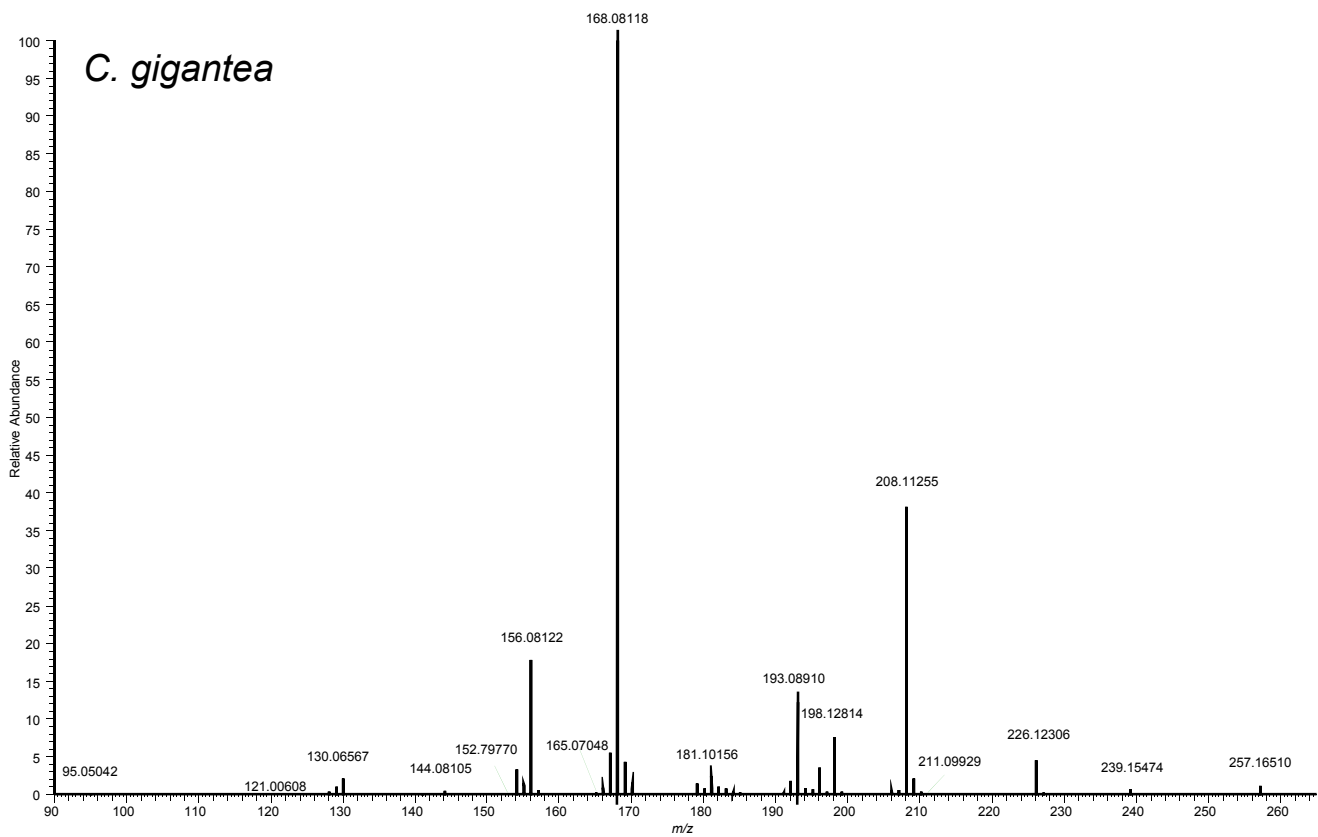

**Figure S1:** Fragmentation of chanoclavine-I, **1**, standard and analyte of similar  $m/z$  from *C. gigantea* sclerotium.

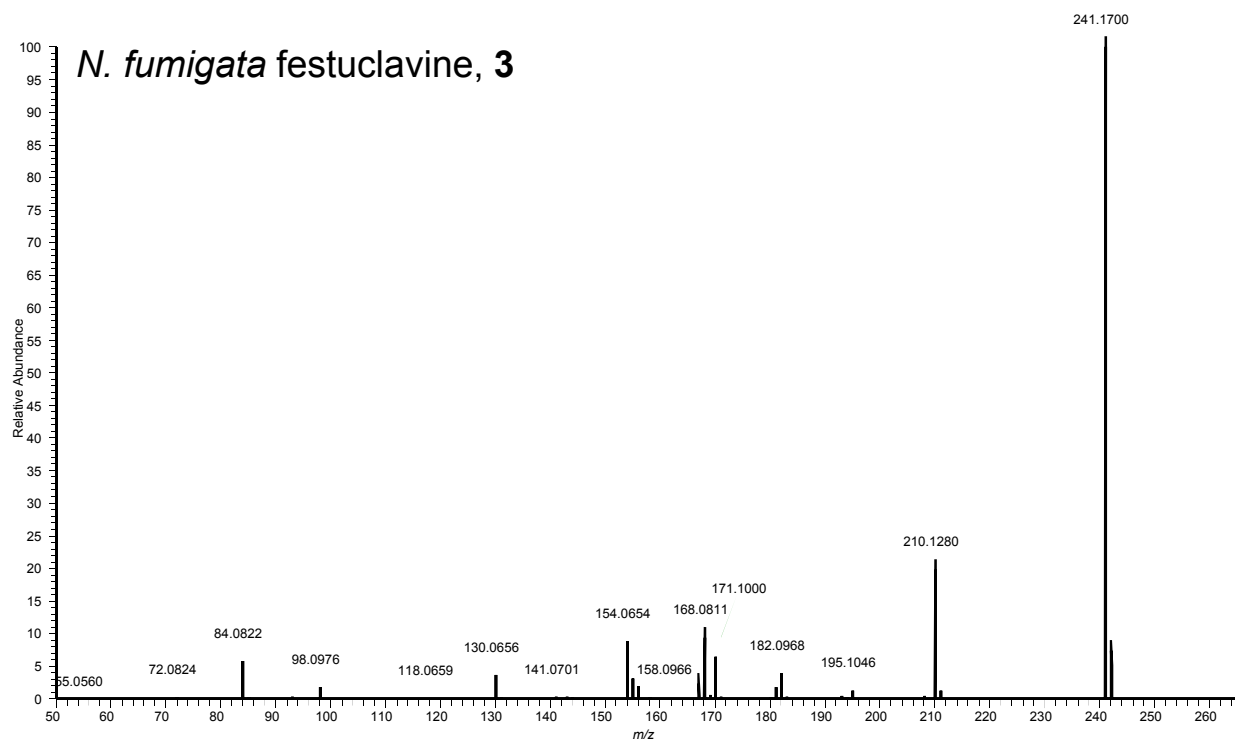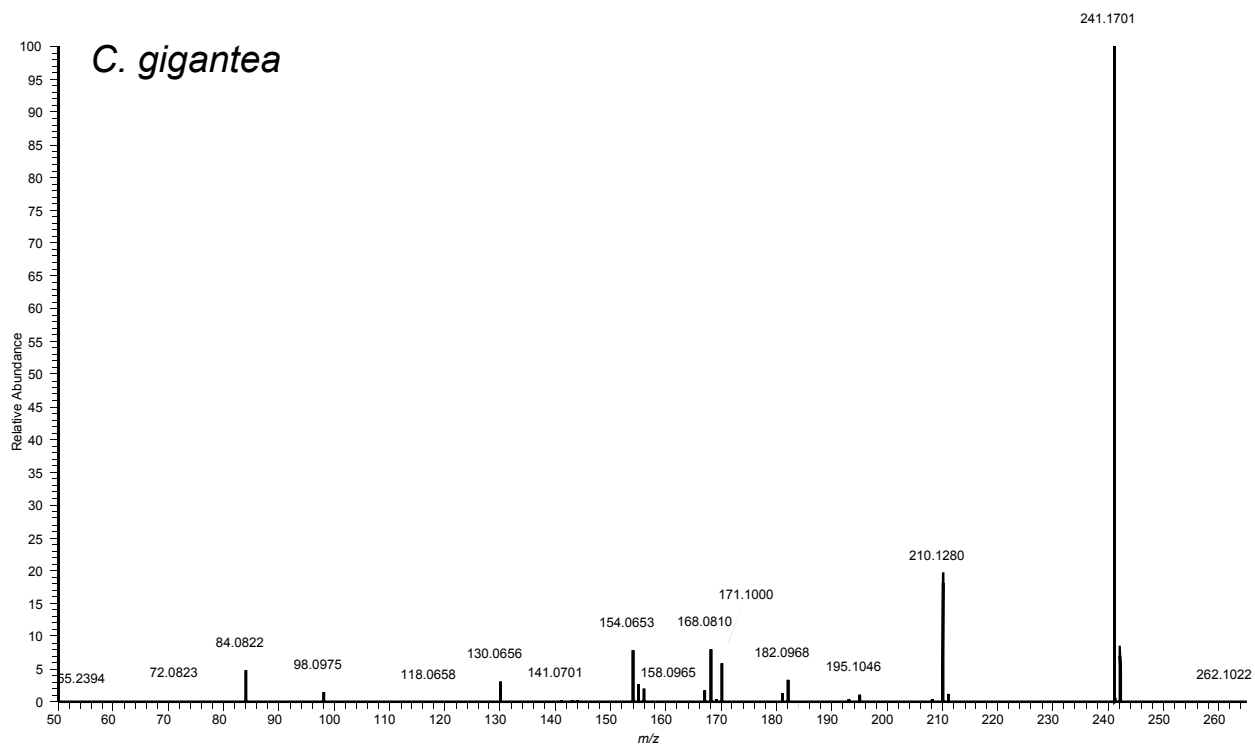

**Figure S2:** Fragmentation of festuclavine, **3**, derived from *N. fumigata* culture and analyte of similar *m/z* value from *C. gigantea* sclerotium.

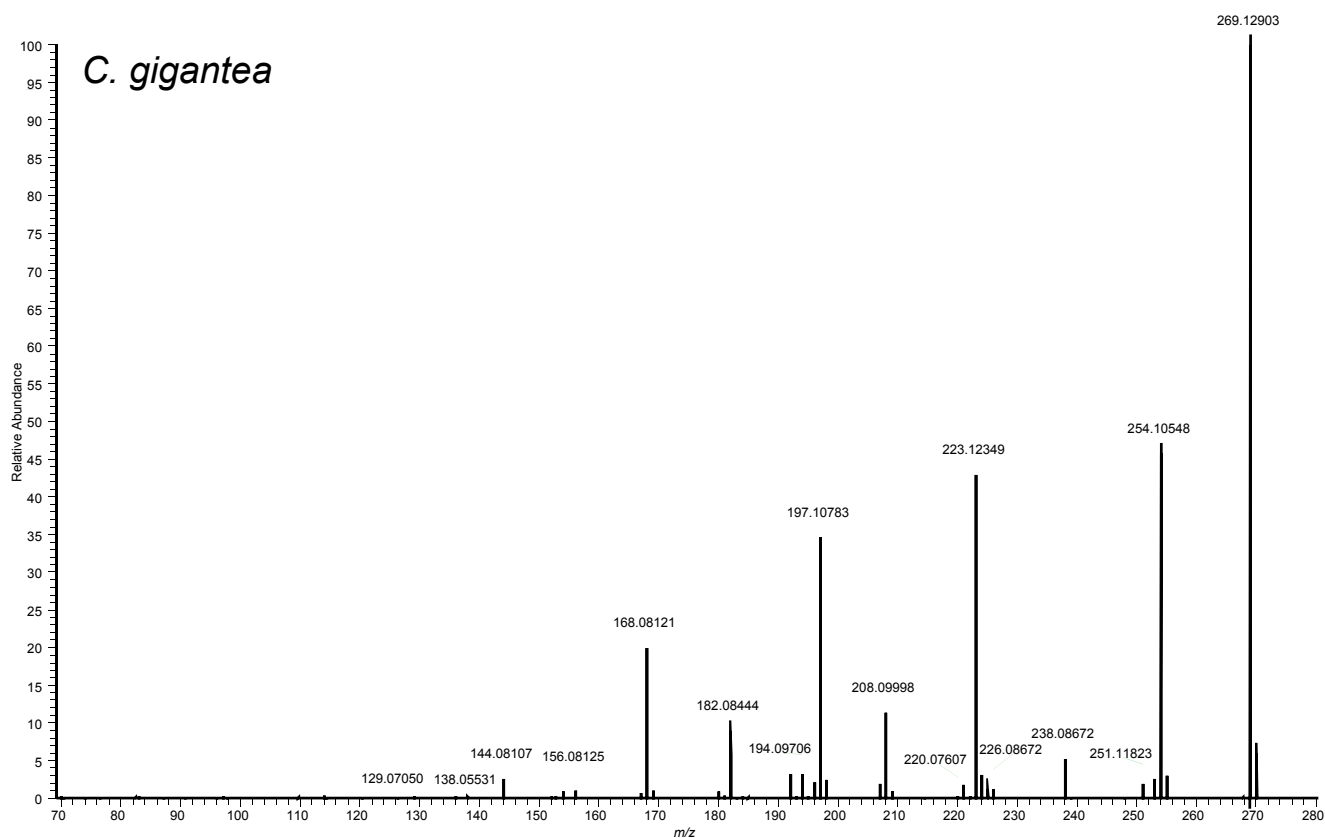

**Figure S3:** Fragmentation of analyte from *C. gigantea* sclerotium with parent ion mass and fragment ion masses similar to those observed previously for lysergic acid, **9**, on similar instrumentation.<sup>1</sup> In that previous study, the observed  $m/z$  value for the parent ion of lysergic acid was 269.1281 and  $m/z$  values for the four most abundant fragments were: 254.1047, 223.1227, 197.1072, and 168.0807.

### References for Supporting Information

(1) Robinson, S.L.; Panaccione, D.G. Heterologous expression of lysergic acid and novel ergot alkaloids in *Aspergillus fumigatus*. *Appl. Environ. Microbiol.* **2014**, *80*, 6465–6472.
